# Supplementary material
Source: PubMed Central journal article supplement (PMC2763324)

## **Supplemental methods**

**Cell culture and treatment.** Human colorectal cancer cell lines RKO and DLD1 were obtained from American Type Cell Collection (ATCC, Manassas, VA) and cultured in McCoy's 5A modified media (Invitrogen, Carlsbad, CA) supplemented with 10% defined FBS (HyClone, Logan, UT), 100 units/ml penicillin and 1% streptomycin (Invitrogen). Cells were maintained at 37°C with 5% CO<sub>2</sub>.

In some experiments, cells were grown in medium containing 0.5% serum. For serum-stimulated G1-S transition, cells in 6-well plates were cultured in serum-free media for 48 h prior to the addition of 10% FBS and harvested at various time points for flow cytometry or BrdU incorporation (1). Experiments were carried out in triplicates with similar results.

For radiation-induced transient G2/M checkpoint, cells in 12-well plates (for counting) or in T25 flasks (for Western blotting, RNA isolation and flow cytometry) were irradiated at 12 Gy at a rate of 82 cGy/min using a <sup>137</sup>Cs irradiator (Mark I., J.L. Shepherd and Associates). Cells were harvest at 1 h or later after irradiation for various analyses. For UV irradiation, cells in 60 cm<sup>2</sup> plates were exposed to 60 J/m<sup>2</sup> (Spectroline M-X-15 G, Spectronics Corp. Westbury, NY.), and harvested at 1 h and 4 h post treatment for RNA isolation.

Clonogenic survival was evaluated by colony formation assays. In brief, cells were plated in 6-well plates at several densities and subjected to  $\gamma$ -irradiation at various doses (0, 1, 4 and 8 Gy) in triplicate. The cells were allowed to grow for 10 to 14 days before staining with crystal violet (Sigma) to visualize the colonies. Fractions of colonies following radiation compared with untreated cells were plotted. Only the colonies containing 30 or more were counted.

**Isolation of microRNAs, Real-Time Polymerase Chain Reaction (PCR) assays, and Northern blotting for mature miRNAs.** Total cellular RNA including microRNA was obtained from cells using the mirVana™ miRNA isolation kit (Ambion, Austin, TX). The expression of mature miRNAs was confirmed using real-time polymerase chain reaction (PCR) analysis with sequence specific primers

according to the instructions of the *mirVana*<sup>TM</sup> qRT-PCR miRNA Detection Kit (Ambion). The expression of protein coding mRNAs was quantitated by real-time PCR with primers described in Table S5. Total RNA was isolated from cells and tissues using the RNeasy Total RNA Isolation System (Qiagen, Madison, WI) and CsCl centrifugation method (2), respectively. First-strand cDNA was synthesized from 2-10 µg of total RNA using Superscript II reverse transcriptase (Invitrogen) as described (3). For Northern analysis, 15 µg of total RNA were separated on a 15% polyacrylamide/8 M urea gel and transferred to a Nylon membrane (Pierce) using a Transblot semidry apparatus (Bio-Rad, Hercules, CA). Membranes were crosslinked according to the manufacturer's manual. The *miR-21* antisense oligonucleotide (5'-TCAACATCAGTCTGATAAGCTA-3') as probe was <sup>32</sup>P labeled with T4 polynucleotide kinase (New England Biolabs, Ipswich, MA). Prehybridizations and hybridizations were carried out using UltraHyb Hybridization Buffer (Ambion) at 37°C. After washing, membranes were wrapped in plastic wrap, and exposed to film at -80 °C for 24 hours.

**Cell growth assays.** Cells were plated at 3000 cells/well in 96-well plates. Cell growth was measured by (MTS) assay using a novel tetrazolium compound [3-(4,5-dimethyl-thiazol-2yl)-5-(3-carboxymethoxyphenyl)-2-(4-sulfophenyl)-2H-tetrazolium in CellTiter 96 AQueous One Solution (Promega, Madison, WI) following the manufacturer's instructions. Each experiment was done in triplicate and repeated at least twice (4).

**Luciferase reporter constructs.** miRNA reporter constructs were created by cloning a PCR generated fragment containing the putative binding site of *miR-21* in the 3'UTR of *Cdc25A* gene into the *Hind* III and *Spe* I sites of the pMIR-REPORT<sup>TM</sup> miRNA expression reporter vector (Ambion). The *miR-21* binding site mutated reporter was constructed by site-directed mutagenesis with the QuikChange XL Site-Directed Mutagenesis Kit (Stratagene) following the instructions of the manufacturer. The primers used are listed in Table S2. Cells were plated at 300,000 cells per well in a

12-well plate 24 hours before transfection. Cdc25A 3'UTR reporter or control plasmid (200 ng) plus 100 ng beta-gal miRNA control vector (Ambion) were transfected using Lipofectamine 2000 (Invitrogen). Luciferase and  $\beta$ -galactosidase activities were determined 24 h after transfection using kits from Promega (Madison, WI) and ICN Biomedicals (Costa Mesa, CA), respectively (5). All the experiments were performed in triplicate and repeated at least three times on different days.

**Drug treatment.** cells were plated in 12-well plates at 20–30% density 24 h before treatment. DMSO stock solutions of anticancer agents were diluted to appropriate concentrations with cell culture medium. The anticancer agents adriamycin, etoposide, camptothecin, and vinblastine were from Sigma (St. Louis, MO); (+)-brefeldin A and staurosporine were from EMD Biosciences (San Diego, CA) and gemcitabine was from Bell Medical Services (Radford, VA).

**Cell cycle analysis.** Cell cycle profiles were determined by flow cytometry. Briefly, cells were trypsinized and washed with PBS and fixed in 70% ethanol. The nuclei of the cells were stained with propidium iodide (PI, Sigma) (10  $\mu$ g/ml) and RNase A (Invitrogen) (10  $\mu$ g/ml) for 30 min. The cell cycle profiles were obtained with a FACStar flow cytometer and analyzed using Cytomation Summit v3.1 (Cytomation, Inc., USA) (6).

**Colon cancers and matched normal tissues.** Samples of colorectal cancer tissue and matched normal colonic epithelium were obtained from patients undergoing surgery and were frozen immediately (<10 min) after surgical resection. Acquisition of tissue specimens was performed in accordance with Health Insurance Portability and Accountability Act of 1996 (HIPAA) regulations. RNA was isolated from portions of tumors judged by histopathology to contain 60 to 90% tumor cells and adjacent normal tissues containing 90% or above epithelial cells. Total RNA was isolated from bulk tissues using CsCl centrifugation method as preciously described (2, 7).

**BrdU incorporation assays.** For microscopic examination, cells in 12-well plates were subjected to various treatments and incubated with 10  $\mu$ M BrdU for 15 min prior to fixation with methanol: acetone (1:1) at -20°C for 15 min. The cells were treated with 2N HCl for 30 min at 37 °C, and washed with PBS, and then incubated with monoclonal Alexa Fluor 594 anti-BrdU conjugated antibody (Invitrogen) for 45 min. The cells were finally counter stained with DAPI (20  $\mu$ g/ml) and analyzed by fluorescence microscopy (3). For flow cytometry, cells in 6-well plates were harvested by trypsinization and fixed with 70% cold ethanol for at least 2 h at 4 °C. The cells were washed once with PBS and resuspended in 2 N HCl/0.5% Triton X-100 and incubated at 37 °C for 30 min. Following two washes in PBS, the cells were blocked in PBS/0.5% Tween-20/50% goat serum for 1 h at room temperature and then incubated with PBS/10% goat serum/0.5% anti-BrdU, Alexa Fluor 488 conjugate antibody (Invitrogen) for 1 h at room temperature. After one wash in PBS/0.5% Tween 20/1% BSA, cells were counterstained with PI (5  $\mu$ g/ml), and analyzed by a FACStar flow cytometer, and the data was analyzed using Cytomation Summit v3.1 (Cytomation, Inc., USA).

**Mitotic index measured by phosphorylated histone 3 (H3) staining.** For the flow cytometry, cells in T25 flasks were washed with PBS, and fixed with 2% formaldehyde for 15 min at room temperature. After fixation, the cells were washed twice with PBS and permeabilized with methanol for 30 min at 4 °C. Following one wash with PBS, the cells were blocked with 50% goat serum in PBS for 1 h at room temperature and incubated with phosphorylated histone H3 antibody (1: 400 diluted with 10% goat serum in PBS) (Upstate Biotechnology, Lake Placid, NY) 1 h at room temperature. The signals were developed with anti-rabbit antibodies Alexa-488 (Pierce, Rockford, IL) (1:300 dilution) in PBS containing 10% goat serum for 30 min at room temperature. The nuclei were counterstained with PI (2  $\mu$ g/ml) for 15 min at room temperature. The phosphorylated H3-positive cells were analyzed using Cytomation Summit v3.1 (Cytomation, Inc., USA).

## Supplemental References

1. Sexl V, Diehl JA, Sherr CJ, Ashmun R, Beach D, Roussel MF. A rate limiting function of cdc25A for S phase entry inversely correlates with tyrosine dephosphorylation of Cdk2. *Oncogene* 1999;18:573-82.
2. Zhang L, Zhou W, Velculescu VE, et al. Gene Expression Profiles in Normal and Cancer Cells. *Science* 1997;276:1268-72.
3. Yue W, Sun Q, Dacic S, et al. Downregulation of Dkk3 activates beta-catenin/TCF-4 signaling in lung cancer. *Carcinogenesis* 2008;29:84-92.
4. Sun Q, Sakaida T, Yue W, Gollin SM, Yu J. Chemosensitization of head and neck cancer cells by PUMA. *Mol Cancer Ther* 2007;6:3180-8.
5. Yu J, Zhang L, Hwang PM, Kinzler KW, Vogelstein B. PUMA induces the rapid apoptosis of colorectal cancer cells. *Mol Cell* 2001;7:673-82.
6. Yu J, Yue W, Wu B, Zhang L. PUMA sensitizes lung cancer cells to chemotherapeutic agents and irradiation. *Clin Cancer Res* 2006;12:2928-36.
7. El-Deiry WS, Tokino T, Velculescu VE, et al. WAF1, a potential mediator of p53 tumor suppression. *Cell* 1993;75:817-25.

## Supplementary Tables

| Table S1 Primers used for <i>miR-21</i> KO constructs and screening |                      |                                                 |
|---------------------------------------------------------------------|----------------------|-------------------------------------------------|
| Locus                                                               | Primer               | Sequence                                        |
| miR-21                                                              | Left Arm-Forward     | 5'-atacatacgcggccgcccaccctcgatgcaatccacctgtg-3' |
|                                                                     | Left Arm-Reverse     | 5'-atacatacccgggtgttacagccatggagatgtcacg-3'     |
|                                                                     | Right Arm-Forward    | 5'-atacatacggtagccagctgtggcatgctcagaggtcc-3'    |
|                                                                     | Right Arm-Reverse    | 5'-atacatacgcggccgcttgttaggagcactcaatactgc-3'   |
|                                                                     | Left Arm-Sequence    | 5'-gtcttacaagtgagctgacac-3'                     |
|                                                                     | Right Arm-Sequence   | 5'-ccctaaacagacaatgctcg-3'                      |
|                                                                     | Screening-Forward P1 | 5'-cttaaattggaggactccaagccg-3'                  |
|                                                                     | Screening-Reverse P2 | 5'-tagctagtgcgatcactactc-3'                     |
| Neo                                                                 | Reverse              | 5'-aagcgcatgctccagactgc-3'                      |

**Table S1.** The sequences of the primers used for *miR-21* KO targeting vector construction, KO screening, and sequencing the junctions in targeted clones for

verification.

| <b>Table S2 Primers for Luciferase reporter construct</b> |                                            |
|-----------------------------------------------------------|--------------------------------------------|
| <b>Primer</b>                                             | <b>Sequence</b>                            |
| Cdc25A-MUT-Forward                                        | 5'-tgacaatctagcaatctccagaccaccaactgg-3'    |
| Cdc25A-MUT-Reverse                                        | 5'-tgggagattgctagattgtcaggcagccaagcctgg-3' |
| Cdc25A-Spe I-Forward                                      | 5'-attaactagtaggtcctgtgagagcgttggacc-3'    |
| Cdc25A-Hind III-Reverse                                   | 5'-atacaagcttcacctcccaccaaatagatacgg-3'    |

**Table S2.** The sequences of the primers used for making *Cdc25A* 3'UTR luciferase reporter constructs.

| <b>Table S3 Genes upregulated in <i>miR-21</i> KO RKO cells</b> |                      |                     |                |
|-----------------------------------------------------------------|----------------------|---------------------|----------------|
| <b>Gene Name</b>                                                | <b>Accession No.</b> | <b>Fold (KO/WT)</b> | <b>P value</b> |
| ANLN                                                            | NM_018685.1          | 2.8                 | 0.008          |
| ANXA1                                                           | NM_000700.1          | 2.5                 | 0.000          |
| ATP5D                                                           | BE798517             | 2.7                 | 0.004          |
| BIRC5                                                           | NM_001168.1          | 4.7                 | 0.001          |
| BTG2                                                            | NM_006763.1          | 2.2                 | 0.019          |
| BUB1                                                            | AF043294.2           | 2.6                 | 0.004          |
| BUB1B                                                           | NM_001211.2          | 2.7                 | 0.006          |
| C1ORF2                                                          | NM_006589.1          | 2.7                 | 0.038          |
| C20ORF1                                                         | AF098158.1           | 3.1                 | 0.003          |
| C7orf48                                                         | BC004308.1           | 2.3                 | 0.004          |
| CAP-C                                                           | NM_005496.1          | 2.7                 | 0.000          |
| CBLB                                                            | U26710.1             | 2.7                 | 0.000          |
| <u>CDC25A</u>                                                   | <u>AI343459</u>      | <u>3.4</u>          | <u>0.011</u>   |
| CDKN3                                                           | AF213033.1           | 4.3                 | 0.008          |
| CENPF                                                           | NM_005196.1          | 3.7                 | 0.002          |
| CTGF                                                            | M92934.1             | 6.0                 | 0.001          |
| D6S52E                                                          | BG028844             | 2.0                 | 0.001          |
| DDB2                                                            | NM_000107.1          | 2.4                 | 0.003          |
| DGAT                                                            | NM_012079.2          | 2.1                 | 0.011          |
| DJ616B8.3                                                       | BC001068.1           | 2.0                 | 0.014          |
| DJ742C19.2                                                      | NM_004900.1          | 2.6                 | 0.000          |
| DKFZp434A0530                                                   | AL136842.1           | 4.1                 | 0.006          |
| DKFZp434N0250.1                                                 | BF108964             | 6.1                 | 0.001          |
| DKFZP586O0223                                                   | AL096741.1           | 3.8                 | 0.006          |
| DNMT1                                                           | NM_001379.1          | 2.1                 | 0.003          |
| DTR                                                             | NM_001945.1          | 3.2                 | 0.014          |
| ECM1                                                            | U65932.1             | 2.4                 | 0.014          |
| EGF-like growth factor                                          | M60278               | 2.6                 | 0.000          |
| ENO2                                                            | NM_001975.1          | 2.4                 | 0.002          |
| EST                                                             | BG165011             | 3.3                 | 0.000          |
| EST                                                             | AI813331             | 3.2                 | 0.000          |
| EST                                                             | BG251556             | 2.8                 | 0.000          |
| EST                                                             | AI655524             | 2.7                 | 0.000          |
| EST                                                             | BE207755             | 2.0                 | 0.000          |
| EST                                                             | AA878383             | 2.8                 | 0.001          |
| EST                                                             | AA417878             | 2.1                 | 0.001          |

|           |             |     |       |
|-----------|-------------|-----|-------|
| EST       | AI208616    | 5.0 | 0.002 |
| EST       | AW129783    | 2.9 | 0.002 |
| EST       | AI374739    | 2.0 | 0.002 |
| EST       | N62196      | 3.6 | 0.003 |
| EST       | AA702788    | 3.6 | 0.004 |
| EST       | AW138134    | 2.2 | 0.004 |
| EST       | AW264125    | 2.0 | 0.004 |
| EST       | AW151538    | 2.5 | 0.006 |
| EST       | AV650867    | 2.6 | 0.008 |
| EST       | A527515     | 2.2 | 0.009 |
| EST       | BF221525    | 6.4 | 0.011 |
| EST       | AA704162    | 2.6 | 0.011 |
| EST       | BE968786    | 6.1 | 0.014 |
| EST       | AI075194    | 2.2 | 0.014 |
| EST       | AW451197    | 6.8 | 0.019 |
| EST       | BF508014    | 4.0 | 0.019 |
| EWS       | U35622.2    | 2.1 | 0.013 |
| FKSG14    | BC005400.1  | 6.1 | 0.002 |
| FLJ10101  | BC002945.1  | 2.0 | 0.002 |
| FLJ10350  | NM_018067.1 | 2.7 | 0.000 |
| FLJ10520  | BC002574.1  | 2.2 | 0.006 |
| FLJ10624  | BG391282    | 7.3 | 0.011 |
| FLJ13576  | R60866      | 2.1 | 0.000 |
| FLJ20085  | NM_017660.1 | 3.4 | 0.003 |
| FLJ20311  | NM_017760.1 | 2.5 | 0.011 |
| FLJ20354  | AK000490.1  | 2.4 | 0.019 |
| FLJ20374  | NM_017793.1 | 2.4 | 0.008 |
| FLJ20538  | AK001039.1  | 2.4 | 0.014 |
| FLJ23468  | NM_024629.1 | 3.0 | 0.000 |
| GCN5L2    | AL571424    | 2.7 | 0.002 |
| GNAS1     | AF064092.1  | 2.1 | 0.004 |
| H2AFX     | NM_002105.1 | 2.1 | 0.004 |
| HAS2      | NM_005328.1 | 2.7 | 0.011 |
| HCAP-G    | NM_022346.1 | 2.8 | 0.002 |
| HCAP-G    | NM_022346.1 | 2.3 | 0.000 |
| HLA-E     | X56841.1    | 2.2 | 0.000 |
| HMG2      | BC000903.1  | 2.1 | 0.000 |
| HPCAL1    | NM_002149.1 | 5.4 | 0.014 |
| HSPC145   | AL135396    | 4.5 | 0.002 |
| HUMGT198A | NM_013290.1 | 3.2 | 0.003 |
| ICBP90    | AK025578.1  | 2.3 | 0.000 |
| ID-GAP    | AU153848    | 2.8 | 0.000 |



|          |             |     |       |
|----------|-------------|-----|-------|
| IL8      | NM_000584.1 | 2.6 | 0.001 |
| ISG20    | NM_002201.2 | 3.8 | 0.006 |
| KDELR1   | NM_006801.1 | 2.4 | 0.003 |
| KIAA0101 | NM_014736.1 | 2.0 | 0.000 |
| KIAA0186 | NM_021067.1 | 2.4 | 0.000 |
| KIAA0233 | NM_014745.1 | 2.1 | 0.000 |
| KIAA0286 | AB006624.1  | 2.1 | 0.002 |
| KIAA0542 | AB011114    | 2.4 | 0.015 |
| KIAA0729 | AW117717    | 2.4 | 0.008 |
| KIAA0964 | BF346592    | 2.6 | 0.000 |
| KIAA1020 | AI912206    | 2.1 | 0.011 |
| KIAA1595 | AB046815.1  | 2.3 | 0.000 |
| KIF4A    | NM_012310.2 | 3.2 | 0.001 |
| KNSL1    | NM_004523.2 | 4.1 | 0.019 |
| KNSL4    | NM_007317.1 | 2.7 | 0.019 |
| KNSL6    | U63743.1    | 2.5 | 0.000 |
| KRTAP4.9 | AJ406941.1  | 2.2 | 0.000 |
| L2DTL    | NM_016448.1 | 3.0 | 0.001 |
| LBP-32   | BE566136    | 2.1 | 0.002 |
| LOC51203 | NM_016359.1 | 3.0 | 0.000 |
| LOC51210 | NM_016372.1 | 2.8 | 0.008 |
| LRP16    | NM_014067.2 | 2.8 | 0.000 |
| MAD1L1   | NM_003550.1 | 2.5 | 0.000 |
| MAD2L1   | NM_002358.2 | 2.4 | 0.000 |
| MCM2     | NM_004526.1 | 2.2 | 0.000 |
| MCM5     | AA807529    | 2.1 | 0.001 |
| MDS030   | NM_018465.1 | 2.0 | 0.003 |
| MEA      | NM_014623.1 | 2.4 | 0.001 |
| MGAT4B   | NM_014275.1 | 2.7 | 0.002 |
| MGC12904 | NM_031219.1 | 6.4 | 0.011 |
| MGC2479  | AL121829    | 2.1 | 0.019 |
| MGC3121  | NM_024031.1 | 2.6 | 0.030 |
| MGC4342  | NM_024329.1 | 2.2 | 0.002 |
| MLF1IP   | NM_024629.1 | 3.0 | 0.000 |
| MLL3     | AA121529    | 2.3 | 0.001 |
| NDUFS8   | NM_002496.1 | 2.6 | 0.002 |
| NESP55   | NM_016592.1 | 2.0 | 0.000 |
| NET1     | AW263232    | 2.0 | 0.001 |
| NFKB2    | BC002844.1  | 2.7 | 0.014 |
| NPIP     | AC002045    | 2.1 | 0.002 |
| NTKL     | AF297709.1  | 2.3 | 0.011 |
| NUSAP1   | NM_016359.1 | 3.0 | 0.000 |

|                    |             |     |       |
|--------------------|-------------|-----|-------|
| OGFR               | NM_007346.1 | 2.3 | 0.019 |
| OIP5               | BE045993    | 3.3 | 0.001 |
| P1cdc47            | D55716.1    | 2.1 | 0.019 |
| PEF                | NM_012392.1 | 2.2 | 0.000 |
| PIR51              | BE966146    | 2.2 | 0.000 |
| pknbeta            | NM_013355.1 | 2.3 | 0.001 |
| PLAB               | NM_007317.1 | 2.7 | 0.002 |
| PLXNB2             | BC004542.1  | 2.3 | 0.014 |
| POLRMT             | NM_005035.1 | 2.0 | 0.011 |
| PPM1G              | NM_002707.1 | 2.0 | 0.003 |
| PRC1               | NM_003981.1 | 4.9 | 0.003 |
| PRIM1              | NM_000946.1 | 2.2 | 0.004 |
| PRO1843            | NM_018507.1 | 3.2 | 0.000 |
| proto-LBC          | AF127481.1  | 2.8 | 0.000 |
| PTD017             | AA152202    | 2.4 | 0.011 |
| PTPRF              | NM_002840.1 | 2.5 | 0.006 |
| RELA               | NM_021975.1 | 2.1 | 0.003 |
| RRM2               | BE966236    | 3.7 | 0.000 |
| RRM2               | BC001886.1  | 3.6 | 0.000 |
| RTN4               | AF333336.1  | 2.0 | 0.000 |
| semaZ              | AB022433.1  | 2.2 | 0.000 |
| SIAT1              | AI743792    | 2.3 | 0.000 |
| Similar to PRO1992 | BC004144.1  | 2.2 | 0.000 |
| SLC25A1            | U25147.1    | 2.6 | 0.000 |
| SLC27A4            | AK000722.1  | 3.0 | 0.003 |
| SLC4A2             | NM_003040.1 | 2.0 | 0.001 |
| SLC7A6             | NM_003983.1 | 2.1 | 0.014 |
| SPINT1             | NM_003710.1 | 2.1 | 0.001 |
| STK6               | NM_003158.1 | 3.4 | 0.002 |
| TCF3               | M31523.1    | 2.6 | 0.000 |
| TCFL5              | NM_006602.1 | 2.0 | 0.001 |
| TFDP1              | NM_007111.1 | 3.3 | 0.008 |
| TGFB1              | BC000125.1  | 2.5 | 0.001 |
| TOP2A              | AU159942    | 5.2 | 0.006 |
| TOPK               | NM_018492.1 | 2.8 | 0.001 |
| TR                 | AB019695.1  | 2.8 | 0.006 |
| TRXR2A             | AF201385.1  | 6.5 | 0.002 |
| TTK                | NM_003318.1 | 2.9 | 0.014 |
| TUFM               | NM_003321.1 | 2.2 | 0.000 |
| TYMS               | NM_001071.1 | 3.1 | 0.001 |
| UBCH10             | NM_007019.1 | 3.3 | 0.001 |
| UBE2M              | NM_003969.1 | 2.6 | 0.008 |

|        |             |     |       |
|--------|-------------|-----|-------|
| WDR1   | NM_017491.1 | 2.3 | 0.000 |
| XAP4   | NM_006462.1 | 2.5 | 0.001 |
| YWHAH  | NM_003405.1 | 2.1 | 0.001 |
| ZNF144 | AI744229    | 2.1 | 0.000 |

**Table S3.** The transcripts that were upregulated by at least two-fold in *miR-21* KO cells transfected with control siRNA compared with parental RKO cells transfected with pre-*miR-21*. The cut-off P value was set at 0.02.

| <b>Table S4 Expression of several <i>miR-21</i> targets</b> |                      |                     |                |
|-------------------------------------------------------------|----------------------|---------------------|----------------|
| <b>Gene Name</b>                                            | <b>Accession No.</b> | <b>Fold (KO/WT)</b> | <b>P value</b> |
| Pdcd4                                                       | NM_014456.1          | 1.1                 | 0.0024         |
| PTEN                                                        | NM_000314.1          | 1.2                 | 0.018          |
| Spry 1                                                      | BF508662             | 1.8                 | 0.001          |
| Spry 2                                                      | NM_005842.1          | 1.44                | 0.046          |
| TMP1                                                        | NM_000366.1          | 1.2                 | 0.001          |

**Table S4.** The ratio (fold) was obtained using expression of a transcript in *miR-21* KO cells transfected with control siRNA divided by that in parental RKO cells transfected with pre-*miR-21*.

| Table S5 Primers for RT-PCR of candidate genes |                                 |
|------------------------------------------------|---------------------------------|
| Primer                                         | Sequence                        |
| Cdc25 A-Forward                                | 5'-tcaccaacctgaccgtcactatg-3'   |
| Cdc25 A-Reverse                                | 5'-tgtgtgaaagagatcttaccctc-3'   |
| NU SAP1 -Forward                               | 5'-tgcagaaacttagccaaagatctgg-3' |
| NU SAP1 -Reverse                               | 5'-agcctgagatcctggcttctc-3'     |
| MLF1 IP-Forward                                | 5'-agctccagtcgctcgaagcggag-3'   |
| MLF1 IP- Reverse                               | 5'-atggcctgagcttctcctg-3'       |
| DDB2 -Forward                                  | 5'-caagaagctctgtgcgaaggc-3'     |
| DDB2 - Reverse                                 | 5'-tgtctcctgtgacccaatcggc-3'    |
| BTG2 -Forward                                  | 5'-gagcagcagagccttaagg-3'       |
| BTG2 -Reverse                                  | 5'-gtacaagacgagatggagc-3'       |
| CTGF -Forward                                  | 5'-aaccgcaagatcgctgtgcacc-3'    |
| CTGF -Reverse                                  | 5'-ggctctaaatagttgggtctg-3'     |
| CENPF-Forward                                  | 5'-agttgaaactacgctgcaaggac-3'   |
| CENPF-Reverse                                  | 5'-cagttcagcctgcagcgttg-3'      |
| Pdcd4 -Forward                                 | 5'-agaggtgagtgtgaaagatcc-3'     |
| Pdcd4 -Reverse                                 | 5'-cagaaacacggtgacctaacc-3'     |
| GAPDH Forward                                  | 5'-ctcagacccaagggaagg-3'        |
| GAPDH Reverse                                  | 5'-atgatctgaggctgtgtca-3'       |

**Table S5.** The sequences of the primers used for RT-PCR.

### Supplementary Figure Legends

#### Figure S1. Generation of *miR-21* KO DLD1 cells

**A.** Identifying *miR-21* KO DLD1 clones following removal of *Neo* by PCR. WT and the recombinant (*miR-21* KO) alleles were indicated. **B.** Cdc25A levels analyzed by RT-PCR in RKO WT and *miR-21* KO cells with or without Pre-*miR-21* transfection. *GAPDH* was used as a loading control.

#### Figure S2. RT-PCR validation of microarray expression results

We selected 12 cell cycle and DNA damage response genes from the list of genes whose expression was upregulated in *mirR-21* KO cells based on the microarray analysis. The expression of 7 candidates was validated using semi-quantitative RT-PCR in RKO WT or *miR-21* KO cells.

**Figure S3. *Cdc25A* is regulated by *miR-21* in DLD 1 cells**

The expression of *Cdc25A* and the effect of pre-*miR-21* on its expression were analyzed in DLD1 cells as in RKO cells (Fig. 2A-D). **A.** Relative *Cdc25A* mRNA expression was measured by real-time RT-PCR in DLD1 wild-type (WT) and *miR-21* knockout (KO) cells. The expression of *Cdc25A* mRNA was normalized to that of *GAPDH*. Values are means  $\pm$  SD, n=3. \*P<0.02. **B.** Expression of *Cdc25A* protein levels was determined by Western blotting. **C.** The effect of precursor *miR-21* on *Cdc25A* levels. Cells were transfected with precursor *miR-21* or control siRNA for 48 h and analyzed for *Cdc25A* expression by RT-PCR. Values are means  $\pm$  SD, n=3. \*P<0.05. Expression levels were normalized to those in control siRNA transfected cells. **D.** *Cdc25A* levels in cells treated as in **C** were analyzed by Western blotting.

**Figure S4. The effects of *miR-21* on the expression of *Cdc25B*, *Cdc25C* and known *miR-21* targets, drug-induced apoptosis or proliferation**

The medium contained 10% serum in all experiments. **A.** The expression of *Cdc25A*, B and C, p-Cdc2, Chk1, and  $\beta$ -Trop was analyzed in the indicated cells by Western blotting. **B.** The expression of several *miR-21* regulated genes or proteins. PTEN and Bcl-2 was measured by Western blotting.  $\alpha$ -tubulin was used as a loading control. The expression of *Pcdc4* mRNA was measured by real-time RT-PCR. Values are means  $\pm$  SD, n=3. \*P>0.3. **C.** The growth rate of indicated cell lines was followed for 7 days by MTS assay. Values are means  $\pm$  SD, n=3. **D.** The parental or *miR-21* KO RKO cells were treated with indicated anticancer agents for 48 h. Apoptosis was quantified by nuclear fragmentation assay. As least 300 cells were scored in each determination and repeated at least twice.

**Figure S5. *miR-21* regulates serum-induced G1-S transition through *Cdc25A***

**A.** An example of BrdU incorporation assay in *miR-21* KO RKO cells. The cells were stimulated with serum for 15 h and incubated with BrdU for 15 min. BrdU

incorporation was determined using an anti-BrdU antibody (red), and the nuclei were counterstained using DAPI (blue). **B.** The indicated RKO cells were cultured in serum free medium for 48 h and then stimulated with 10% fetal calf serum. Levels of Cdc25A in indicated cells following serum stimulation were analyzed in the indicated time by Western blotting. **C.** The indicated RKO and DLD1 cell lines in log phase in the presence of 10% serum were analyzed for cell cycle by flow cytometry. No significant differences in cell cycle distribution were found between the parental and *miR-21* KO cells.

**Figure S6. *miR-21* modulates DNA damage-induced G2/M checkpoint in colon cancer cells.**

**A.** The indicated RKO cells were harvested at 1 h after irradiation (IR, 12Gy) followed by staining with phospho-histone H3 (Ser10) antibody. The nuclei were counter stained by propidium iodide (PI). The fractions of p-H3 positive cells were analyzed by flow cytometry with representative profiles shown. **B.** The indicated DLD1 cells were subjected to irradiation (IR, 12Gy) and harvested at 1 h after radiation followed by staining with phospho-histone H3 (Ser10) antibody as in A (right panel). The phospho-histone H3 positive cells were quantified (the middle panel). **C.** The levels of Cdc25A were analyzed by Western blotting in the indicated DLD1 cells 1h after irradiation. **D.** The levels of *miR-21* in RKO cells normalized to those of *U6* at indicated time points after UV irradiation ( $60 \text{ J/m}^2$ ) were determined by realtime RT-PCR. Values are means  $\pm$  SD, n=3.

Wang *et. al* Figure S1

A

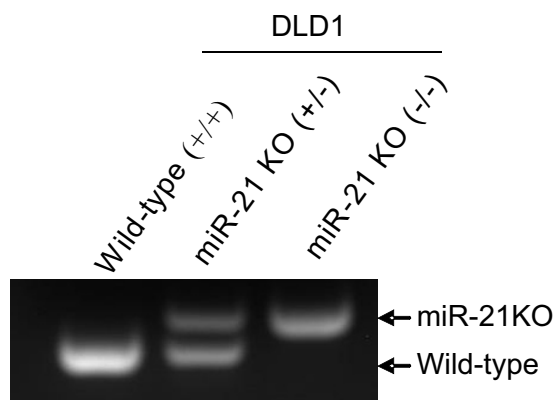

B

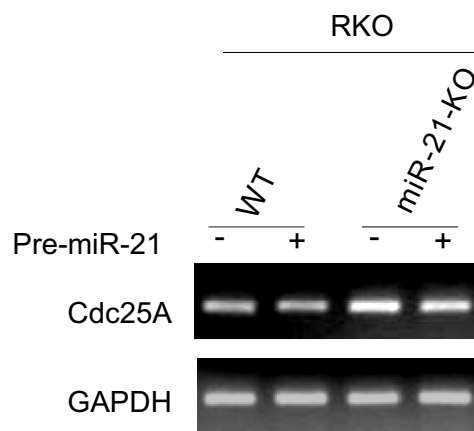

Wang *et. al* Figure S2

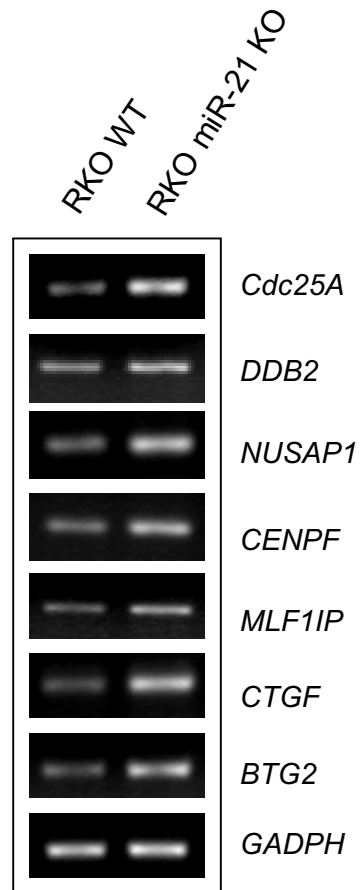



Wang *et al.* Figure S3

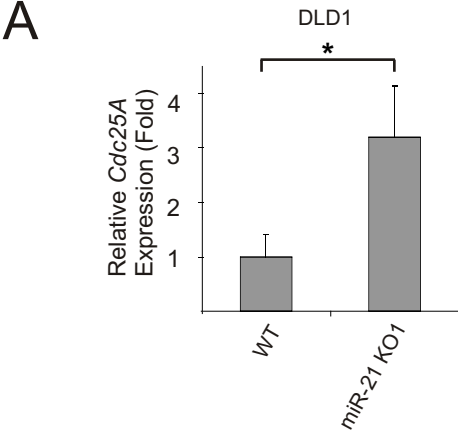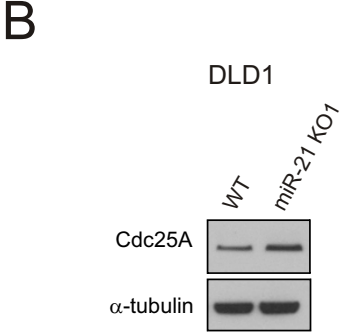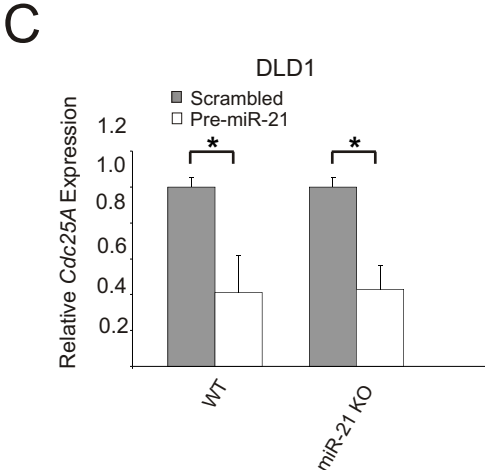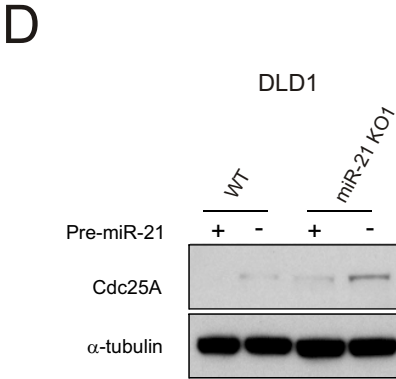

# Wang *et al.* Figure S4

## A

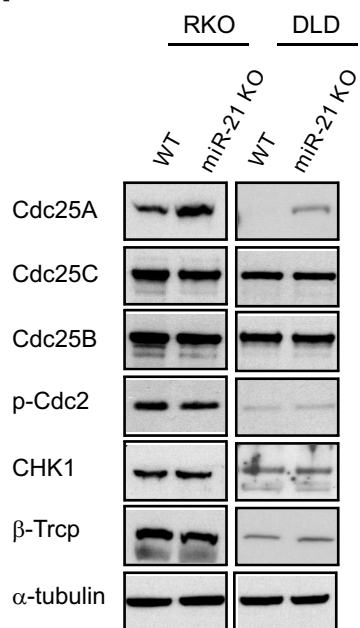

## B

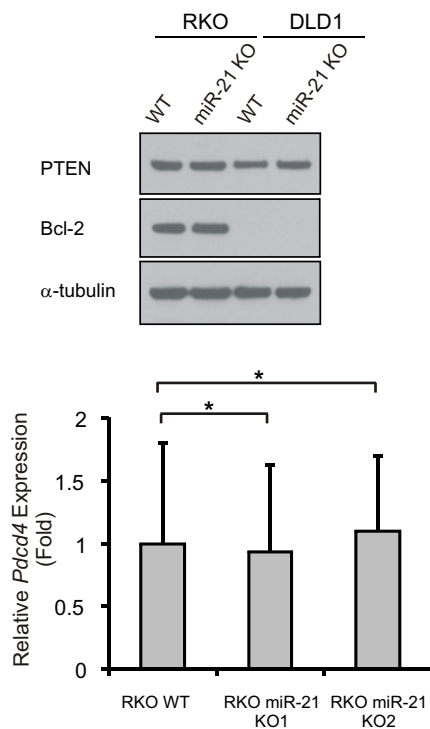

## C

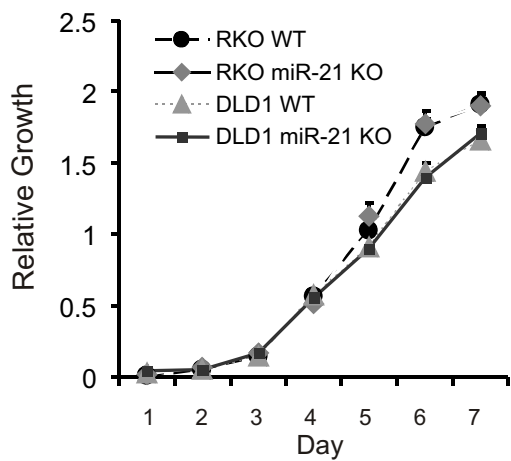

## D

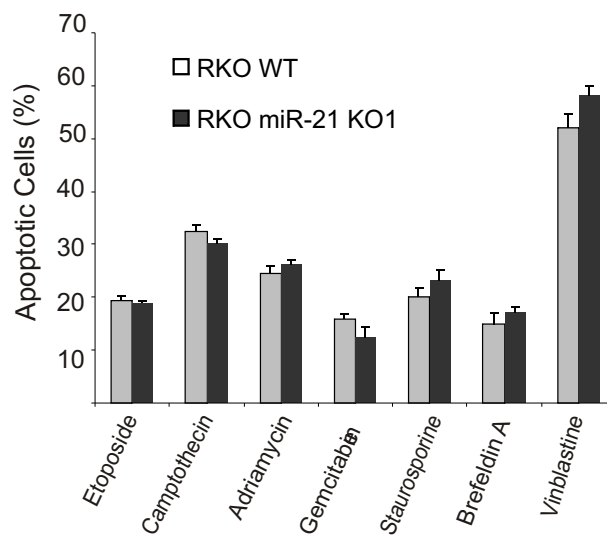

Wang *et. al* Figure S5

A

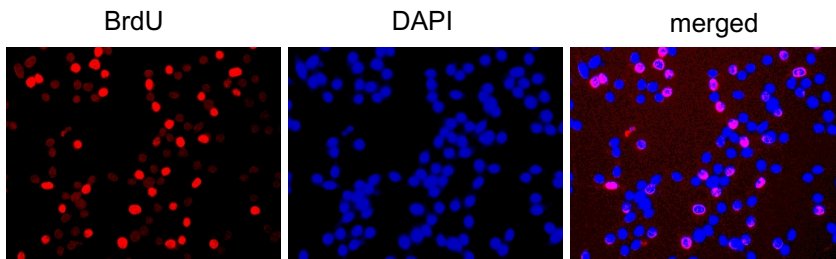

B

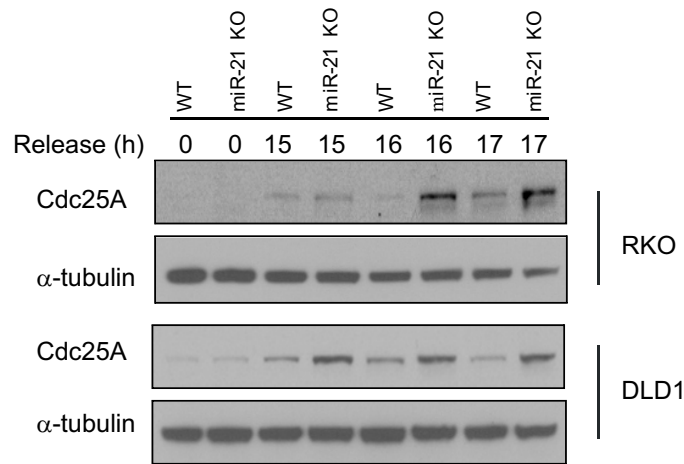

C

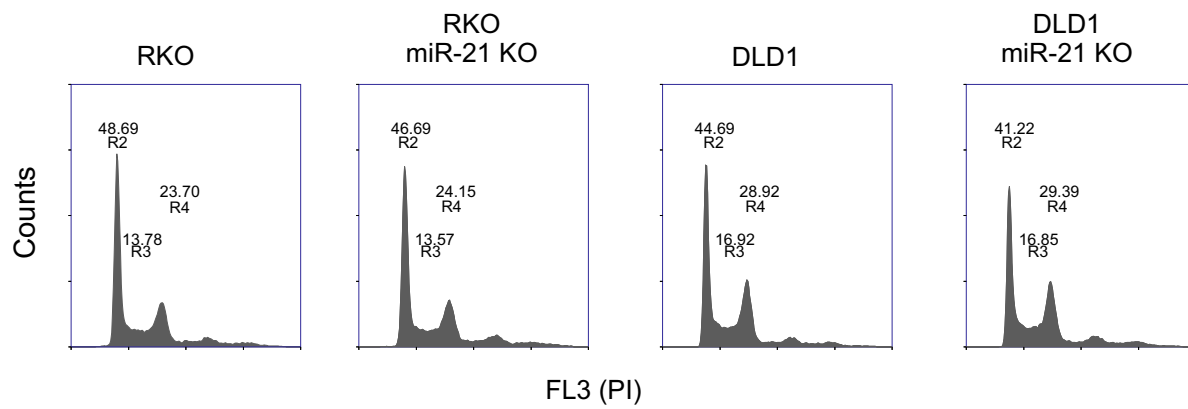

# Wang *et al.* Figure S6

**A**

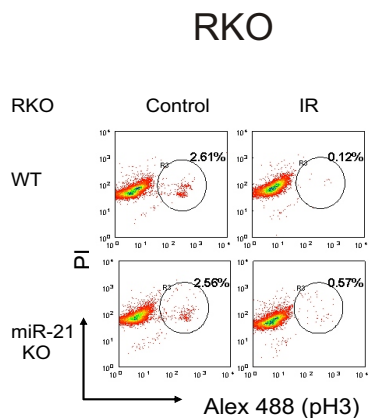

**C**

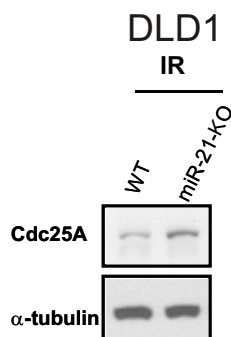

**B**

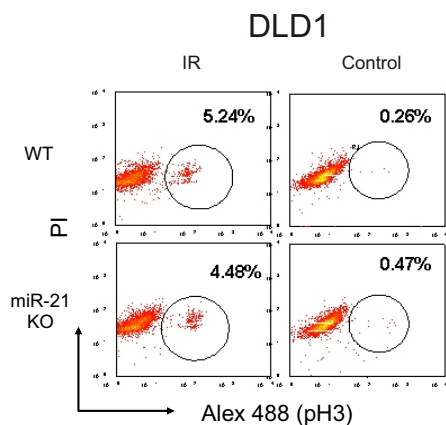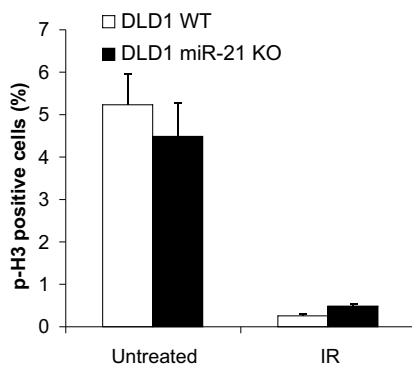

**D**

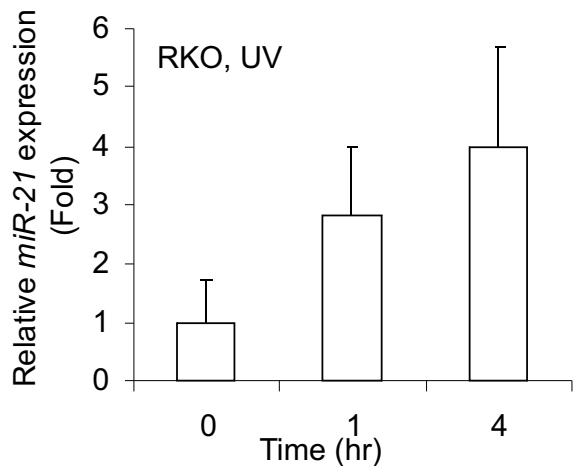

Supplement: NIHMS143917-supplement-1.pdf [file NIHMS143917-supplement-1.pdf]
